# Supplementary material for: Identification of Newer Stable Genetic Sources for High Grain Number per Panicle and Understanding the Gene Action for Important Panicle Traits in Rice
Source: MDPI journal article supplement (doi:10.3390/plants12020250), 2023-01-05
Supplement: s1 [file s1]

**Table S1** Analysis of variance for fourteen panicle and yield related traits estimated over two seasons

| Characters                                                 | Genotypes    | Season     | Genotypes × Season | Error  |
|------------------------------------------------------------|--------------|------------|--------------------|--------|
| Degrees of freedom (DF)                                    | 49           | 1          | 49                 | 294    |
| Plant height (PH)                                          | 259.010 **   | 645.85**   | 110.21**           | 25.65  |
| Number of productive tillers (NPT)                         | 20.660 **    | 565.70**   | 15.75**            | 6.80   |
| Flag leaf area (FLA)                                       | 35.60**      | 245.50**   | 8.50**             | 4.52   |
| Panicle length (PL)                                        | 29.355 **    | 266. 26**  | 6.99**             | 3.52   |
| Number of spikelets per panicle (NOSPP)                    | 27462.184 ** | 12443.14** | 2268.52**          | 850.20 |
| Number of grains per panicle (NOGPP)                       | 24995.463 ** | 15184.17** | 2035.40**          | 675.42 |
| Number of primary branches per panicle (NOPB)              | 21.775 **    | 6.61**     | 2.14*              | 1.05   |
| Number of secondary branches per panicle (NOSB)            | 718.196 **   | 2370.5**   | 134.52**           | 45.60  |
| Number of secondary branches per primary branches (NOSBPB) | 1.350 **     | 4.56**     | 1.56               | 0.50   |
| Number of spikelets in primary branches (NOSIPB)           | 477.919 **   | 354.50**   | 78.50**            | 32.50  |
| Number of spikelets in secondary branches (NOSISB)         | 22803.498 ** | 8456.50**  | 1120.60**          | 265.68 |
| Length of primary branches (LOPB)                          | 3.65**       | 78.03**    | 1.56*              | 1.02   |
| Thousand grain weight (TGW)                                |              |            |                    |        |
| Grain yield per plant (GYP)                                | 67.758 **    | 2701.09**  | 65.50**            | 15.65  |

**Table S2** Specific combining ability effects of direct and reciprocal hybrids to panicle and yield related traits.

| Cross Name             | ID  | D/R | PH                   | NPT                  | FLA                  | PL                   | NOSPP                 | NFGPP                 | NOPB                 | NOSB                 | NOSBPB               | NOSIPB               | NOSISB                | LOPB                 | TGW                  | GYP                  |
|------------------------|-----|-----|----------------------|----------------------|----------------------|----------------------|-----------------------|-----------------------|----------------------|----------------------|----------------------|----------------------|-----------------------|----------------------|----------------------|----------------------|
| IET 28834 × IET 28835  | C1  | D   | -2.792 <sup>ns</sup> | -2.896*              | 2.922 <sup>ns</sup>  | -5.431**             | 54.236**              | 50.924*               | 0.611 <sup>ns</sup>  | 8.222**              | 0.448**              | 3.213 <sup>ns</sup>  | 50.648**              | 0.346 <sup>ns</sup>  | -0.907**             | -1.002 <sup>ns</sup> |
| IET 28834 × ADT (R) 48 | C2  | R   | 7.5**                | 0.25 <sup>ns</sup>   | -1.94 <sup>ns</sup>  | 8.425**              | 15.125 <sup>ns</sup>  | 14.875 <sup>ns</sup>  | 1.125 <sup>ns</sup>  | 1.75 <sup>ns</sup>   | -0.053 <sup>ns</sup> | 9.375*               | 5.75 <sup>ns</sup>    | 0.15 <sup>ns</sup>   | -0.875**             | 0.023 <sup>ns</sup>  |
| IET 28834 × BPT 5204   | C3  | D   | 2.458 <sup>ns</sup>  | 2.438*               | 4.437*               | 0.917 <sup>ns</sup>  | 25.32 <sup>ns</sup>   | 22.319 <sup>ns</sup>  | 0.042 <sup>ns</sup>  | 4.882 <sup>ns</sup>  | 0.151 <sup>ns</sup>  | 3.095 <sup>ns</sup>  | 16.766 <sup>ns</sup>  | -0.622 <sup>ns</sup> | -0.740**             | -2.247*              |
| IET 28834 × CB12132    | C4  | R   | 0.875 <sup>ns</sup>  | 2.125 <sup>ns</sup>  | -0.115 <sup>ns</sup> | -0.688 <sup>ns</sup> | -3.125 <sup>ns</sup>  | -3.625 <sup>ns</sup>  | -0.125 <sup>ns</sup> | 0.875 <sup>ns</sup>  | 0.12 <sup>ns</sup>   | -3.75 <sup>ns</sup>  | 8.375 <sup>ns</sup>   | 0.375 <sup>ns</sup>  | 0.250 <sup>ns</sup>  | 1.468 <sup>ns</sup>  |
| IET 28834 × IET 28749  | C5  | D   | 1.938 <sup>ns</sup>  | 1.854 <sup>ns</sup>  | -3.342 <sup>ns</sup> | 0.884 <sup>ns</sup>  | 5.236 <sup>ns</sup>   | 7.403 <sup>ns</sup>   | 2.896**              | 0.611 <sup>ns</sup>  | -0.199 <sup>ns</sup> | 10.72**              | -3.838 <sup>ns</sup>  | 0.379 <sup>ns</sup>  | 1.085**              | 3.204**              |
| IET 28835 × ADT (R) 48 | C6  | R   | 2.375 <sup>ns</sup>  | -0.5 <sup>ns</sup>   | 1.282 <sup>ns</sup>  | 0.1 <sup>ns</sup>    | 17.375 <sup>ns</sup>  | 19.375 <sup>ns</sup>  | 3.25**               | 1.25 <sup>ns</sup>   | -0.275 <sup>ns</sup> | 7.375 <sup>ns</sup>  | 10 <sup>ns</sup>      | 0.238 <sup>ns</sup>  | 0.075 <sup>ns</sup>  | -2.603 <sup>ns</sup> |
| IET 28835 × BPT 5204   | C7  | D   | -3.667*              | 0.833 <sup>ns</sup>  | -8.653**             | -0.412 <sup>ns</sup> | -88.056**             | -85.785**             | -1.729*              | -11.097**            | -0.297 <sup>ns</sup> | -9.197**             | -77.338**             | -1.077**             | 1.135**              | 0.704 <sup>ns</sup>  |
| IET 28835 × CB12132    | C8  | R   | 0.25 <sup>ns</sup>   | 1.5 <sup>ns</sup>    | -1.620 <sup>ns</sup> | -0.313 <sup>ns</sup> | 3.125 <sup>ns</sup>   | 3.375 <sup>ns</sup>   | 0.625 <sup>ns</sup>  | -2.75 <sup>ns</sup>  | -0.38 <sup>ns</sup>  | 6.5 <sup>ns</sup>    | -3.375 <sup>ns</sup>  | 0.588 <sup>ns</sup>  | 0.475 <sup>ns</sup>  | 6.703**              |
| IET 28835 × ADT (R) 48 | C9  | D   | 0.417 <sup>ns</sup>  | 0.208 <sup>ns</sup>  | -3.598 <sup>ns</sup> | 1.263 <sup>ns</sup>  | -9.931 <sup>ns</sup>  | -7.41 <sup>ns</sup>   | 0.173 <sup>ns</sup>  | -1.508 <sup>ns</sup> | -0.041 <sup>ns</sup> | 2.491 <sup>ns</sup>  | -11.734 <sup>ns</sup> | 0.386 <sup>ns</sup>  | 1.914**              | 2.16 <sup>ns</sup>   |
| IET 28835 × BPT 5204   | C10 | R   | -0.375 <sup>ns</sup> | -0.375 <sup>ns</sup> | -1.347 <sup>ns</sup> | -0.688 <sup>ns</sup> | 5.5 <sup>ns</sup>     | 5 <sup>ns</sup>       | 1.918*               | 1.668 <sup>ns</sup>  | -0.223 <sup>ns</sup> | 3.625 <sup>ns</sup>  | 4.75 <sup>ns</sup>    | 0.463 <sup>ns</sup>  | 0.375 <sup>ns</sup>  | 2.18 <sup>ns</sup>   |
| IET 28835 × CB12132    | C11 | D   | 1.521 <sup>ns</sup>  | 0.354 <sup>ns</sup>  | 2.995 <sup>ns</sup>  | 0.922 <sup>ns</sup>  | 6.861 <sup>ns</sup>   | 4.444 <sup>ns</sup>   | -0.354 <sup>ns</sup> | 3.09 <sup>ns</sup>   | 0.053 <sup>ns</sup>  | -2.62 <sup>ns</sup>  | 7.919 <sup>ns</sup>   | -0.579 <sup>ns</sup> | 0.339 <sup>ns</sup>  | -1.205 <sup>ns</sup> |
| IET 28835 × ADT (R) 48 | C12 | R   | 1.375 <sup>ns</sup>  | -0.25 <sup>ns</sup>  | 1.255 <sup>ns</sup>  | 0.475 <sup>ns</sup>  | 0.25 <sup>ns</sup>    | 1 <sup>ns</sup>       | 0 <sup>ns</sup>      | -1 <sup>ns</sup>     | -0.105 <sup>ns</sup> | -1.375 <sup>ns</sup> | -0.375 <sup>ns</sup>  | -0.485 <sup>ns</sup> | -0.325 <sup>ns</sup> | 0.705 <sup>ns</sup>  |
| IET 28835 × BPT 5204   | C13 | D   | 1.125 <sup>ns</sup>  | 0.646 <sup>ns</sup>  | -0.839 <sup>ns</sup> | -0.212 <sup>ns</sup> | -14.347 <sup>ns</sup> | -11.097 <sup>ns</sup> | -0.125 <sup>ns</sup> | -3.056 <sup>ns</sup> | -0.097 <sup>ns</sup> | 2.38 <sup>ns</sup>   | -20.81 <sup>ns</sup>  | 0.575 <sup>ns</sup>  | 1.364**              | 1.543 <sup>ns</sup>  |
| IET 28835 × CB12132    | C14 | R   | 2.75 <sup>ns</sup>   | -1 <sup>ns</sup>     | -3.137 <sup>ns</sup> | -0.913 <sup>ns</sup> | -2.125 <sup>ns</sup>  | -4.125 <sup>ns</sup>  | 0.75 <sup>ns</sup>   | -4 <sup>ns</sup>     | -0.435*              | 6.375 <sup>ns</sup>  | -11.875 <sup>ns</sup> | 1.05*                | -0.150 <sup>ns</sup> | -3.713**             |
| IET 28835 × ADT (R) 48 | C15 | D   | -3.854*              | -0.875 <sup>ns</sup> | -5.716**             | -0.333 <sup>ns</sup> | -61.889**             | -61.785**             | -0.125 <sup>ns</sup> | -11.264**            | -0.58**              | -2.287 <sup>ns</sup> | -63.06**              | 0.382 <sup>ns</sup>  | 0.989**              | -0.792 <sup>ns</sup> |
| IET 28835 × BPT 5204   | C16 | R   | -2 <sup>ns</sup>     | -0.75 <sup>ns</sup>  | -1.165 <sup>ns</sup> | -0.75 <sup>ns</sup>  | -15.875 <sup>ns</sup> | -14.625 <sup>ns</sup> | -0.5 <sup>ns</sup>   | -3 <sup>ns</sup>     | -0.15 <sup>ns</sup>  | -3 <sup>ns</sup>     | -15.5 <sup>ns</sup>   | 0.638 <sup>ns</sup>  | 0.925**              | 3.948**              |
| IET 28835 × ADT (R) 48 | C17 | D   | 3.229*               | -0.875 <sup>ns</sup> | -3.713 <sup>ns</sup> | 2.867**              | -8.389 <sup>ns</sup>  | -4.535 <sup>ns</sup>  | 0.694 <sup>ns</sup>  | 0.618 <sup>ns</sup>  | 0.009 <sup>ns</sup>  | 6.651*               | -2.831 <sup>ns</sup>  | -0.444 <sup>ns</sup> | 1.343**              | -3.335**             |
| IET 28835 × BPT 5204   | C18 | R   | -2.125 <sup>ns</sup> | -1.5 <sup>ns</sup>   | 0.130 <sup>ns</sup>  | 0.275 <sup>ns</sup>  | -6.875 <sup>ns</sup>  | -5.125 <sup>ns</sup>  | -0.375 <sup>ns</sup> | 1.375 <sup>ns</sup>  | 0.175 <sup>ns</sup>  | -2.375 <sup>ns</sup> | 12.25 <sup>ns</sup>   | 0.325 <sup>ns</sup>  | 0.050 <sup>ns</sup>  | -2.125 <sup>ns</sup> |
| ADT (R) 48 × BPT 5204  | C19 | D   | -3.75*               | 3.979**              | -4.071*              | -0.226 <sup>ns</sup> | -64.389**             | -59.951**             | -2.069**             | -6.521*              | -0.047 <sup>ns</sup> | -9.239**             | -52.692**             | -0.131 <sup>ns</sup> | -0.194 <sup>ns</sup> | -0.35 <sup>ns</sup>  |
| ADT (R) 48 × CB 12132  | C20 | R   | -1.25 <sup>ns</sup>  | 1.375 <sup>ns</sup>  | 0.840 <sup>ns</sup>  | 0.663 <sup>ns</sup>  | -8.75 <sup>ns</sup>   | -8.875 <sup>ns</sup>  | 0.125 <sup>ns</sup>  | -0.75 <sup>ns</sup>  | -0.115 <sup>ns</sup> | -2.75 <sup>ns</sup>  | -6 <sup>ns</sup>      | -0.113 <sup>ns</sup> | 0.050 <sup>ns</sup>  | 1.695 <sup>ns</sup>  |
| ADT (R) 48 × IET 28749 | C21 | D   | -1.854 <sup>ns</sup> | -0.292 <sup>ns</sup> | -6.483**             | -1.06 <sup>ns</sup>  | -7.431 <sup>ns</sup>  | -8.014 <sup>ns</sup>  | -0.694 <sup>ns</sup> | -1.104 <sup>ns</sup> | 0.22 <sup>ns</sup>   | 5.345 <sup>ns</sup>  | -10.442 <sup>ns</sup> | 0.901*               | 0.031 <sup>ns</sup>  | 3.108**              |
| ADT (R) 48 × BPT 5204  | C22 | R   | -3.875*              | -0.375 <sup>ns</sup> | 0.922 <sup>ns</sup>  | 0.463 <sup>ns</sup>  | -75.75**              | -76**                 | -1.25 <sup>ns</sup>  | -13.125**            | -0.72**              | -4.875 <sup>ns</sup> | -70.875**             | -0.85*               | 1.175**              | -2.738*              |
| ADT (R) 48 × IET 28749 | C23 | D   | -1.646 <sup>ns</sup> | -4.292**             | -4.035*              | 2.015**              | -70.306**             | -63.639**             | -1.75*               | -6.972*              | -0.004 <sup>ns</sup> | -2.093 <sup>ns</sup> | -69.588**             | 0.013 <sup>ns</sup>  | 2.960**              | -6.236**             |
| BPT 5204 × CB 12132    | C24 | R   | 0.625 <sup>ns</sup>  | -0.125 <sup>ns</sup> | -1.192 <sup>ns</sup> | 0.138 <sup>ns</sup>  | -19.875 <sup>ns</sup> | -21.875 <sup>ns</sup> | -0.5 <sup>ns</sup>   | -1.75 <sup>ns</sup>  | -0.033 <sup>ns</sup> | 0.125 <sup>ns</sup>  | -20 <sup>ns</sup>     | -0.85*               | -0.175 <sup>ns</sup> | 0.48 <sup>ns</sup>   |
| BPT 5204 × IET 28749   | C25 | D   | 2.375 <sup>ns</sup>  | -2.375*              | 9.276**              | 2.582**              | 100.361**             | 100.57**              | 1.285 <sup>ns</sup>  | 11.875**             | 0.238 <sup>ns</sup>  | -0.655 <sup>ns</sup> | 102.204**             | 0.715*               | -0.394 <sup>ns</sup> | -8.794**             |
| BPT 5204 × CB 12132    | C26 | R   | 0.625 <sup>ns</sup>  | 0.5 <sup>ns</sup>    | -2.010 <sup>ns</sup> | 1.025 <sup>ns</sup>  | -14.625 <sup>ns</sup> | -17.5 <sup>ns</sup>   | -1 <sup>ns</sup>     | -0.5 <sup>ns</sup>   | -0.053 <sup>ns</sup> | -1.125 <sup>ns</sup> | -13.5 <sup>ns</sup>   | 0.125 <sup>ns</sup>  | 0.000 <sup>ns</sup>  | 2.6 <sup>ns</sup>    |
| BPT 5204 × IET 28749   | C27 | D   | 5.583**              | 0.5 <sup>ns</sup>    | 4.134*               | -0.593 <sup>ns</sup> | 31.111 <sup>ns</sup>  | 11.069 <sup>ns</sup>  | 0.729 <sup>ns</sup>  | 5.257 <sup>ns</sup>  | 0.094 <sup>ns</sup>  | 2.282 <sup>ns</sup>  | 26.308 <sup>ns</sup>  | 0.115 <sup>ns</sup>  | -2.665**             | 1.95 <sup>ns</sup>   |
| CB12132 × IET 28749    | C28 | R   | -1.875 <sup>ns</sup> | -0.125 <sup>ns</sup> | 0.550 <sup>ns</sup>  | -0.375 <sup>ns</sup> | -25.625 <sup>ns</sup> | 4.75 <sup>ns</sup>    | -1.5 <sup>ns</sup>   | -5.625 <sup>ns</sup> | -0.03 <sup>ns</sup>  | -2 <sup>ns</sup>     | -23.625 <sup>ns</sup> | -0.388 <sup>ns</sup> | 0.450 <sup>ns</sup>  | 0.445 <sup>ns</sup>  |
| SE (Sij)               | C29 | D   | 5.729**              | 1.104 <sup>ns</sup>  | 14.833**             | -0.301 <sup>ns</sup> | 13.319 <sup>ns</sup>  | 15.382 <sup>ns</sup>  | -0.021 <sup>ns</sup> | 2.924 <sup>ns</sup>  | 0.143 <sup>ns</sup>  | 3.366 <sup>ns</sup>  | 7.308 <sup>ns</sup>   | 0.596 <sup>ns</sup>  | -2.265**             | -0.103 <sup>ns</sup> |
| SE (Rij)               | C30 | R   | -2 <sup>ns</sup>     | 0 <sup>ns</sup>      | -7.39**              | -0.25 <sup>ns</sup>  | -49.375*              | -44.5 <sup>ns</sup>   | 0.5 <sup>ns</sup>    | -1.25 <sup>ns</sup>  | -0.193 <sup>ns</sup> | 10.625**             | -60**                 | 0.525 <sup>ns</sup>  | 0.700*               | -0.123 <sup>ns</sup> |
| SE (Sij)               |     |     |                      | 1.1656               | 1.9942               | 0.3853               | 18.9255               | 20.0035               | 0.7414               | 3.0671               | 0.1645               | 3.2977               | 17.2067               | 0.3367               | 0.266                | 1.1021               |
| SE (Rij)               |     |     |                      | 1.3715               | 2.3466               | 0.4534               | 22.2696               | 23.5381               | 0.8724               | 3.6091               | 0.1936               | 3.8804               | 20.2470               | 0.3962               | 0.313                | 1.2968               |

**TABLE S3** List of genotypes used for morphological diversity for panicle and yield related traits

| Sl. No. | Genotype name             | Parentage                                                  | Type     |
|---------|---------------------------|------------------------------------------------------------|----------|
| 1       | <i>Sembil priyan</i>      | -                                                          | Landrace |
| 2       | <i>Karuka</i>             | -                                                          | Landrace |
| 3       | <i>Kallukar</i>           | -                                                          | Landrace |
| 4       | <i>Kalarkar</i>           | -                                                          | Landrace |
| 5       | <i>T 396 periya samba</i> | -                                                          | Landrace |
| 6       | <i>Nootripathu</i>        | -                                                          | Landrace |
| 7       | <i>Muttakar</i>           | -                                                          | Landrace |
| 8       | <i>Kothamalli samba</i>   | -                                                          | Landrace |
| 9       | <i>Katta samba</i>        | -                                                          | Landrace |
| 10      | CO 52                     | CO (R) 50/ BPT 5204                                        | Landrace |
| 11      | IET29519                  | CN 1920 / Savitri // IR 71700-247- 1-1-2                   | Culture  |
| 12      | <i>Mikkuruvai</i>         | -                                                          | Culture  |
| 13      | IW PONNI                  | -                                                          | Variety  |
| 14      | IARI 3                    | -                                                          | Variety  |
| 15      | IET 28835                 | Anjali*3/IR 81896-B-195                                    | Culture  |
| 16      | IET 28834                 | IR84984-83-15-481-B/3* Anjali // IR81896-B-B-195/3* Anjali | Culture  |
| 17      | ADT (R) 48                | IET 11412/IR 64                                            | Variety  |
| 18      | BPT 5204                  | GEB-24 ×T(N) 1× Mahsuri                                    | Landrace |

|    |                |                                   |         |
|----|----------------|-----------------------------------|---------|
| 19 | CB12132        | CO (R) 50 / CB501                 | Culture |
| 20 | IET 28749      | BPT5 204 mutant                   | Variety |
| 21 | CO 51          | ADT 43/RR 272-1745                | Variety |
| 22 | CO (R) 50      | CO 43/ ADT38                      | Variety |
| 23 | ADT 37         | BG 280-12/PTB 33                  | Variety |
| 24 | MDU 5          | <i>O. glaberrima</i> / Pokkali    | Variety |
| 25 | ADT 45         | IR 50/ADT 37                      | Variety |
| 26 | ADT 43         | IR 50/ White ponni                | Variety |
| 27 | TRY 2          | RP 825 – 45 – 1- 3 / IR 36        | Variety |
| 28 | IET 29537      | Samba Mashuri*2 / ST 12           | Culture |
| 29 | CRAC 3998-43-1 | Doubled haploid of 27P63          | Culture |
| 30 | IET 29494      | ADT 49 / MTU 1150                 | Culture |
| 31 | IET 29530      | Doubled haploid of 27P63          | Culture |
| 32 | IET 29499      | GR-11 / IET 19791(26-3-1-1-1-1-1) |         |
| 33 | IET 29529      | RP 5977 / BPT 5204                | Culture |
| 34 | IET 29523      | R 1033-2559-1-1 / Gopal bhog      |         |
| 35 | IET 29504      | BPT 5204 Mutant                   | Culture |
| 36 | IET 29539      | MTU 1156 / MTU 1081               | Variety |
| 37 | IET 29516      | ADT 43 / BPT 5204                 | Culture |
| 38 | IET 29495      | MTU 1010 / RPHR 1005              | Culture |
| 39 | WGL-1283       | WGL-14 / JGL -17025               | Culture |
| 40 | BPT 3082       | BPT 5204 / MTU 1075               | Culture |

|    |            |                                                   |         |
|----|------------|---------------------------------------------------|---------|
| 41 | KNM 7714   | RNR 15048 / GNV -8-89 // WGL 32183                | Culture |
| 42 | NP 9253-13 | NP 14 / NP 4201                                   | Culture |
| 43 | ADT 49     | CR 1009/J.Samba                                   | Variety |
| 44 | KNM 7715   | RNR 15048 / GNV - 8 – 89 // WGL 32183             | Culture |
| 45 | IET 29492  | CSR 27 / BPT 5204                                 | Culture |
| 46 | GNV 1974   | IET 24716 / NLR 34449                             | Culture |
| 47 | RNR 29094  | BPT-5204 / BM-7 (BBM-1) // BPT5204 / BM-71(BBM-2) | Culture |
| 48 | BPT 3059   | MTU 1061 / IR 78585-64-2-4-3                      | Culture |
| 49 | ANNA (R) 4 | Pantdhan 10 X IET 9911                            | Variety |
| 50 | ACM 20001  | Anna (R) 4 mutant                                 | Mutant  |

---
